# Supplementary material
Source: publisher figshare collection journal article supplement (https://karger.figshare.com/ndownloader/files/26420594)
Supplement: Supplementary file 1 [file 26420594]

## Sheet: Sheet1
Compiled TBI studies in the MENA region with their charcteristics
	Article Title	Author	Publication Year	Country of Study (Modified)	Cause of TBI	Sample Size	Nationality of Patients (Modified)	Number of Males	Percentage of Males	Number of Females	Percentage of Females	In Hospital Mortality	In Hospital Mortality Percentage	Number of Patients with Mild TBI	Percentage of Patients with Mild TBI	Number of Patients with Moderate TBI:	Percentage of Patients with Moderate TBI	Number of Patients with Severe TBI	Percentage of Patients with Severe TBI	Tools Used (Modified)	CT SCAN FINDINGS (Modified)	Aim(s) of The Study (Modified)	INDEX:	Extra COMMENTS
45	A comparative analysis of length of stay of traumatic and non-traumatic brain injured patients in Saudi Arabia	M. S. Al-Jadid and A. A. Robert	2010	KSA	Mulitple TBI Causes	580	Saudi Arabia	471	81.21	109	18.79											Associate TBI with another variable	Factors affecting the Length of Stay (LoS) of TBI and NTBI Patients
7	A diagnostic dilemma in Jordan: two child abuse case studies	H. Nazer, T. Daradkeh, S. Mohamed, A. Q. Shamayleh and O. Marei	1988	Jordan	Assault/Violence	2	Jordan	2	100	0	0										Hematoma		Child Abuse Violence
11	A HOSPITAL-BASED STUDY OF FALLS FROM HEIGHTS IN CHILDREN IN SOUTH WESTERN SAUDI-ARABIA	S. H. Annobil, O. P. Binitie, Y. Ranganayakulu, O. Ogunbiyi, T. Almalki and W. Bassuni	1995	KSA	Fall	104	Saudi Arabia and Other	67	64.42	37	35.58	3	3	36	52	27	38	7	10	GCS CT Scan	Hematoma Hemorrhages Skull Fractures Contusion cerebral infarction abdominal and chest injuries, long bone fractures	Investigate outcomes of TBI to study the types of injuries and the final outcome following childhood accidental falls from heights	85 of the subjects were Saudi nationals and 19 were non-Saudi nationals 81% of the patients were under 6 years old 15 of the subjects had no inuries
78	A study on road traffic crashes and injuries in Qatar as reported by drivers	A. Bener	2012	Qatar	MVA	1762	Qatar	1223	69.4	539	30.6											Determine the contributing factors to RTCs and RTIs that coincide with the rapid urbanization of the State of Qatar.	QATAR, RTC RTI, DRIVERS, DISTRACTION, INJURIES, LIGHT VEHICLE, HEAVY VEHICLE VIOLATION
1	Abusive head Trauma in children: The extent and clinical characteristics	F. T. Al-Mahroos, E. A. Al-Amer, H. A. Al-Hashimi, A. M. Abdulla and N. Hameed	2011	Bahrain	Assault/Violence	23	Bahrain	16	70	7	30	4	17							Surgical		Identify the extent of AHT in Bahrain, victims' characteristics and the clinical features.	abusive head trauma children abusers bahrain retinal presentation of ahi
142	Accidental injuries during muslim pilgrimage	A. S. Al-Harthi and M. Al-Harbi	2001	KSA	Mulitple TBI Causes	248		195	78.63	53	21.37	2	0.81								Multiple System Injury (with head): 50 1: C5-C6 spinal fractures, blunt abdomen injury and a fractured femur 1: thoracic injury		Hajj
79	Accuracy of Canadian CT head rule in predicting positive findings on CT of the head of patients after mild head injury in a large trauma centre in Saudi Arabia	A. F. Arab, M. E. Ahmed, A. E. Ahmed, M. A. Hussein, A. A. Khankan and R. N. Alokaili	2015	KSA	MVA	368		287	78	81	22									GCS CT Scan	Hemorrhages Skull Fractures Brain Edema	Test the practical value of the CCHR by reapplying the guidelines to measure the number of unjustified head CT scans in a single high volume trauma centre	sensitivity, specificity, positive and negative predictive values were calculated to assess the accuracy of the Canadian computed tomography head rule justified and unjustified CT scans accuracy of the GCS and CCHR in predicting CT scan
80	Acute head injuries managed in the intensive care unit of al-adan hospital, kuwait	A. Adeloye, N. Al-Kouka, M. R. Al-Saigh and A. G. Elgohary	1992	Kuwait	MVA	53		50	94.34	3	5.66	6	11.32	0	0	17	32.08	36	67.92	GCS CT Scan	Hematoma Brain Edema Contusion		Intracranial hematoma most common mass lesion acute subdural hematoma associated with the highest mortality preponderance of male patients and of patients under the age of 40
71	Alcohol-related road traffic injuries in Al-Ain City, United Arab Emirates	O. T. Osman, A. K. Abbas, H. O. Eid, M. O. Salem and F. M. Abu-Zidan	2015	KSA UAE	MVA	771	United Arab Emirates and Other	597	77	174	23	15	2	707	92	20	3	40	5			Prospectively study the demography, severity of injury and outcome of alcohol-related road trafﬁc collision (RTC) injuries in the United Arab Emirates.	Age groups were Not Specified Age groups were Not Specfied, NONE caused by a war injury Yes all 767 TBI were MVA related, Lebanese are unspecified, although 390 Subjects were from a non UAE nationality without further specification None None None None None in Al-Ain City, UAE 390 are definetly UAE and therefore non Lsbanese
82	All Terrain Vehicle (ATV) crashes in an unregulated environment: A prospective study of 56 cases	M. Alani, A. Zarour, A. Almadani, A. Al-Aieb, H. Hamzawi and K. I. Maull	2012	Qatar	MVA	56		47	83.93	9	16.07									GCS	Mean Injury Severity Score was 8-9 with a range from 1 to 50		ATV Safety and regulations
20	An analysis of in-hospital deaths at a modern combat support hospital	M. a. Martin, J. b. Oh, H. c. Currier, N. d. Tai, A. a. Beekley, M. a. Eckert and J. b. Holcomb	2009	Iraq	Military	151	Iraq and Other	134	89	17	11		100									Perform a detailed analysis of inhospital deaths at a combat support hospital.	Age groups not specified, most likely All were adults Age groups were not specified, most likeyl, all were adults. All 151 deaths including the 68 death were War related causes None due to MVA (ALL were related to war injuries), Out of the whole 151 died patients, 104 patients were Iraqi, HOWEVER out of the 68 patients who died due to TBI, the nationality was NOT specified None due to Falls (All …
143	An enemy hides in the ceiling; pediatric traumatic brain injury caused by metallic ceiling fan: Case series and literature review	S. S. Hoz, A. A. Dolachee, H. A. Abdali and H. Kasuya	2019	Iraq	Others	29	Iraq	12	41	17	59	4	4	28	97	0	0	1	3	GCS CT Scan Surgical	Contusion Positive CT finding 29 100% Compound DSF 28 96.6% Compound linear fracture 1 3.5% EDH 9 31% SDH 3 10.3% ICH 1 3.5% SAH 3 10.3% Contusions 14 48.3% Pneumocephalus 25 86.2%
72	An investigation of emotional deficit and facial emotion recognition in traumatic brain injury: A neuropsychological study	M. M. J. Alqahtani	2015	KSA	MVA	35		22	62.85	13	37.14									GCS		Assess emotional functioning: perception of facial affect and alexithymia, matching TBI patient and control performance; and (2) to extend the investigation to identify the potential relationships between emotional deficits, depression, anxiety and cognitive performance.
83	Analysis of 303 road traffic accident victims seen dead on arrival at emergency room-assir central hospital	A. N. Batouk, N. Abu-Eisheh, S. Abu-Eshy, M. Al-Shehri, M. Ai-Naami and S. Jastaniah	1996	KSA	MVA	574		283	93.4	20	6.6										Skull Fractures	Determine the rank of road traffic acciden(tR TA) amongo therc ausesin patientsw ho were already dead on arrival (DOA) at the EmergencyD epartmen(tE D) in our region. 2. To determine the characteristics of populationsin volvedi n RTA ands eena sD OA. 3. To determineth e typeo f injuriesi n theD OA victim	SAUDI ARBIA RTA dead on arrival age distribution seasonal distribution time distribution injuris
84	Apathy and depression in cross-cultural survivors of traumatic brain injury	S. Al-Adawi, A. S. S. Dorvlo, D. T. Burke, C. C. Huynh, L. Jacob, R. Knight, M. K. Shah and A. A. Al-Hussaini	2004	Oman	MVA	80	Oman	53	66.25	29.7	33.75			6	7.5	2	2.5	36	45	GCS	Hematoma Neuroimaging (computed tomography imaging or magnetic resonance imaging): Diffused: 45 (56.3%) Bilateral frontal hematoma: 30 (37.5%) Focal: 5 (6.3%)	Investigate the occurrence of TBI to determine whether depression and apathy could be seen as separate entities in an Omani brain-injury population	AES (Apathy Evaluation Scale) is not a sutiable tool for identifying those with depression depression
85	Associated head injuries and survival rate of patients with maxillofacial fractures in road traffic accident: A prospective study in Saudi Arabia	O. M. Aldwsari, K. H. Aldosari, M. K. Alzahrani, Z. A. Alzahrani, A. H. Alanazi, K. M. Alkhathlan, M. G. Alzahrani, A. H. Alzahrani and S. Al-Ghamdi	2018	KSA	MVA	236	Saudi Arabia	231	98	5	3									CT Scan	Maxillary sinus 12%, orbitall wall 9.3%, occipital 1.7%, temporal 13.9%, zygomatic 6.3%, perietal 18.6%, mandible 7.6%, parasymphyseal 1.7%, frontal 12.2%, bicondyler 1.7%, nasal 7.2%, sphenoid 1.3%
21	Being a neighbor to Syria: A retrospective analysis of patients brought to our clinic for cranial gunshot wounds in the Syrian civil war	M. a. Aras, M. a. Altaş, A. a. Yilmaz, Y. a. Serarslan, N. a. Yilmaz, E. b. Yengil and B. a. Urfali	2014	Syria	Military	186	Syria	164	88.17	20	11.8	17	9.13							GCS Surgical		Carry out a retrospective analysis of the patients admitted to our hospital for cranial gunshot wounds during the Syrian civil war and to share our experience	"factors accompanying the bad outcomes in fire arm injuries in the head include a GCS of 3 on admission, subarachnoid bleeding on CT, intracerebral hematoma, ventricular injury, intraventricu- lar hemorrhage,multilobarorbihemispheric injury accompanied by diffuse fragmentation, bullet crossing/covering the geographical centers of the brain, hypoxia, and hypotension on admission" "patientswithGCSo…
86	Bicycle-related injuries requiring hospitalization in the United Arab Emirates	A. F. Hefny, H. O. Eid, M. Grivna and F. M. Abu-Zidan	2012	UAE	MVA	130	United Arab Emirates and Other	126	98	4	2									GCS		Investigate outcomes of TBI Investigate the occurrence of TBI
22	Blast injuries of large tyres: case series	A. F. Hefny, H. O. Eid, M. Al-Bashir and F. M. Abu-Zidan	2010	UAE	MVA	7		727	100	0	0	2	29							GCS		Investigate outcomes of TBI
23	Blast injury in children: an analysis from Afghanistan and Iraq, 2002-2010	M. J. Edwards, M. Lustik, M. R. Eichelberger, E. Elster, K. Azarow and C. Coppola	2012	Iraq	Military	4983	Iraq	4308	88	601	12	349	7									Associate TBI with another variable
148	Camel racing injuries among children	A. Bener, F. H. Al-Mulla, S. M. Q. Al-Humoud and A. Azhar	2005	Qatar	Sports and Recreational	275	Egypt, Qatar and Other	275	100	0	0	3	1							CT Scan	Injuries Scored by AIS AIS- FREQUENCY -% Minor 95 (34.4%) Moderate 61 ( 22.1%) Serious 50 ( 18.1%) Severe 32 ( 11.6%) Critical 20 (7.3%) Maximum 18 (6.5%)	Determine the frequency and severity of camel racing injuries among children aged 5 to 15 years during the period 1992 to 2003 in the State of Qatar	CAMEL RACING CHILDREN SPORT INJURIES HOSPITAL LEGHT OF STAY AIS
12	Camel-related injuries in the pediatric age group	A. Nawaz, H. Matta, M. Hamchou, A. Jacobsz and A. H. Al Salem	2005	UAE	Sports and Recreational	78		78	100	0	0			27	34.61	17	21.79	17	21.79
5	Care of pediatric neurosurgical patients in Iraq in 2007: clinical and ethical experience of a field hospital	J. E. Martin, R. J. Teff and P. C. Spinella	2010	Iraq	Assault/Violence	287							4							Surgical
87	Causes and outcome predictors of traumatic brain injury among emergency admitted pediatric patients at Cairo university hospitals	M. R. L. Youssef and Y. S. Galal	2015	Egypt	MVA	67	Egypt	38	57	29	43	28	42							GCS CT Scan	Hematoma	Determine the major cause	Whole sample, 67 patients, belonged to the pediatric age group
88	Causes and patterns of adult traumatic head injuries in Saudi Arabia: implications for injury prevention	A. Al-Habib, A. A-shail, A. Alaqeel, M. Zamakhshary, K. Al-Bedah, M. AlQunai and S. Al-enazi	2013	KSA	MVA	1870		1706	91.23	164	8.77	555	29.68	561	30.3	241	13	1049	56.7	GCS CT Scan Surgical	Spine Fracture: Cervical: 191 (10.2%) Thoracic: 101 (5.4%)		Adult MVC
46	Causes and patterns of spine trauma in children and adolescents in Saudi Arabia: implications for injury prevention	A. Al-Habib, A. Alaqeel, I. Marwa, M. Almohammadi, H. Al Shalaan, S. AlEissa, M. Zamakhshary, K. Al-Bedah, S. Al-Enazi and F. Mukhtar	2014	KSA	Mulitple TBI Causes	8941		7493		1449										GCS CT Scan	Skull Fractures Head and Body: 28 Spinal Cord and Head: 3 Spinal Cord, head and body: 2		spine trauma children and adolescents
89	Causes of traumatic brain injury in patients admitted to Rafidia, Al-Ittihad and the specialized Arab hospitals, Palestine, 2006--2007	R. Younis, M. Younis, S. Hamidi, M. Musmar and A. R. Mawson	2011	Palestine	MVA	312	Palestine	253	81	59	18								44.9			Determine the major cause Associate TBI with another variable
13	Cerebellar mutism following closed head injury in a child	R. Kariyattil, M. I. A. Rahim and U. Muthukuttiparambil	2015	Oman	Fall	1		1	100	0	0									GCS CT Scan	Contusion Done- Comminuted fracture of the right occipt, small cerebellar contussion and a hematom in 4th ventricle.	Report a case of a cerebellar mutism due to head trauma which is a rare etiology	1 child, 7-year-old male No adults, not war injury related, falldown YES, 1 case, motor deficit Fall Induced , nationality not specified, cerebellar mutism
6	Characteristics of Nonaccidental Fractures in Abused Children in Riyadh, Saudi Arabia	A. H. Jawadi, M. Benmeakel, M. Alkathiri, M. A. Almuneef, W. Philip and M. Almuntaser	2019	KSA	Assault/Violence	56	Saudi Arabia	33	59	23	41
8	Child abuse in Kuwait: problems in management	W. Al-Ateeqi, I. Shabani and A. Abdulmalik	2002	Kuwait	Assault/Violence	16	Kuwait	11	68.75	5	31.25	1	6.25								Hemorrhages bruises, cut wounds, and fractures were mentioned		child abuse, islamic law, corporal punishment
90	Child and youth traffic-related injuries: use of a trauma registry to identify priorities for prevention in the United Arab Emirates	M. Grivna, P. Barss, C. Stanculescu, H. O. Eid and F. M. Abu-Zidan	2013	UAE	MVA	193	United Arab Emirates	168	87	25	13		6									Investigate outcomes of TBI Investigate the occurrence of TBI
2	Child homicide in Cairo from 2006 to 2010: characteristics and trends	D. Alsaif, K. Alsowayigh, M. Alfaraidy, M. Albayat, G. Alshamsi, M. Aldosary, M. Madadin, M. Afify and M. Kharoshah	2013	Egypt	Assault/Violence	60		28	46.6	32	53.3									CT Scan	Internal injuries were mostly intracranial (41, 73%), followed by visceral injuries (9, 15%), fractured ribs (5, 8%) and fractured extremities (1, 2%).	Determine the characteristics and trend of child homicidal death in Cairo.	"Most of the cases (38, 63%) died on scene; 7 cases (12%) died on arrival to the hospital or during treatment within 24 h of inflicted trauma and 15 cases (25%) died more than 24 h after trauma." "cause of death was most commonly due to trauma to the head (25, 42%)." rta mechais of injury time relation to outcome Children egypt homicides head injury offender intracranial injury
3	Child physical abuse in Bahrain: a 10-year study, 2000-2009	F. Al-Mahroos and E. Al-Amer	2012	Bahrain	Assault/Violence	237	Bahrain	137	58	100	42	4	1.4								Skull Fractures		child, bahrain, injuries, parents, socioeconomic status, level of education
91	Childhood casualties during civil war: Syrian experience	A. Celikel, K. Karbeyaz, B. Kararslan, M. M. Arslan and C. Zeren	2015	Syria	Military	140	Syria	109	77.9	31	22.1	140	100							CT Scan	AIS N % 3 6( 4.3%) 4 39 (27.9%) 5 58 (41.4%) 6 37 (26.4%)	Evaluate demographical data and injury characteristics of Syrian children who were wounded in Syria Civil War and died while being treated in Turkey.	SYRIAN WAR TURKEY CHILDREN FORENSIC MEDICINE AUTOPSY Bombing and shrapnel HEAD ND NECK INHURY MULTIPLE INJURIES ISS AIS INTRACRANIAL HE CEREBRAL PARENCHYMAL HE
14	Childhood injuries in Oman: retrospective review of a multicentre trauma registry data	A. Mehmood, P. Agrawal, K. A. Allen, A. Al-Kashmiri, A. Al-Busaidi and A. A. Hyder	2018	Oman	Fall	795	Oman	531	67	264	33
92	Clinical characteristics and prognosis of traumatic head injury following road traffic accidents admitted in ICU "analysis of 694 cases"	H. Chelly, M. Bahloul, R. Ammar, A. Dhouib, K. B. Mahfoudh, M. Z. Boudawara, O. Chakroun, I. Chabchoub, A. Chaari and M. Bouaziz	2019	Algeria	MVA	694	Tunisia	592	85.3	102	14.7	198	28.5	69	11.1	225	35.8	334	53.1	GCS	Hematoma Hemorrhages IntraCerebral Lesions Skull Fractures Brain Edema Contusion Subfalcine Herniation Subarachnoid hemorrhage 526 (75.8%) Fracture of skull 405 (58.4%) Cerebral contusion 515 (74.2%) Cerebral edema 217 (31%) Diffuse axonal injury 342 (49.3%) Extradural hematoma 186 (26.8%) Subdural hematoma 314 (45.2%) Pneumocephalus 143 (20.6%) Mass lesion 258 (37.2%) Brain herniation 161 (23%) …	Investigate outcomes of TBI
155	Combat casualty care: the Alpha Surgical Company experience during Operation Iraqi Freedom	T. J. Marshall, Jr.	2005	Kuwait	Military	15																			15 patients, all of which were from the Non-Alcohol group
73	Conservative management of acute epidural hematoma in a pediatric age group	M. A. Jamous, H. Abdel Aziz, F. Al Kaisy, H. Eloqayli, M. Azab and M. Al-Jarrah	2009	Jordan	MVA	6	Jordan	3	50	3	50	9		6	100	0	0	0	0	GCS CT Scan	Hematoma Skull Fractures	Investigate outcomes of TBI The aim of this study is to report the outcome after nonsurgical management in those children who remain in good clinical condition	All 6 patients (100%) belomged to the pediatric age group None of the patients belonged to the adult age group, None of the injuries were related to war injuries 1 patient (16.66%) had his injury due to a MVA, None of them seems to be Lebanese (unspecified but they all seem to be Jordanian) 1 patient (16.66%) had his injury due to a MVA 5 out of the 6 injuries were cause by falls None None None T…	Exxcellent Article, Many valuable information were included
93	Correlation between Glasgow coma scale and Jugular venous oxygen saturation in severe traumatic brain injury	M. S. Sharf and M. A. El-Gebali	2013	Egypt	MVA	44	Egypt	39	72	15	28	17	32							GCS		Associate TBI with another variable correlate between Jugular venous oxygen saturation (Sjvo2) with GCS in cases with severe traumatic brain injury			151,All THE CASES were those of patients who died after the admission and before DC or Transfer from the hospital
24	Cranio-maxillo-facial injuries in civilians from Iraq caused by bomb attacks and gunshots: experience of a humanitarian project in Jordan	A. Eckardt and Al-Jawadi A.	2011	Iraq	Military	144	Iraq
42	Decompressive craniotomy after traumatic brain injury: Post operative clinical outcome	M. Lotfy, A. El Said and S. Sakr	2010	Egypt	Mulitple TBI Causes	20		14	70	6	30	6	25							GCS CT Scan	Hematoma Contusion	Investigate outcomes of TBI To assess the postoperative clinical outcome and compare it with other series	No children, all the patients were ABOVE the age of 20 All 2 patients were adults, the ETIOLOGY of the TBI was NOT reported!! the ETIOLOGY of the TBI was NOT reported!! The Nationality was not specified, however, most probably the patients are Egyptian The ETIOLOGY of the TBI was NOT reported!! The ETIOLOGY of the TBI was NOT reported The ETIOLOGY of the TBI was NOT reported The ETIOLOGY of the T…
144	Domestic donkey (Equus africanus asinus) bites: An unusual aetiology of severe scalp injuries in Morocco	H. Droussi, D. E. Amrani, M. Dlimi, K. Elatiqi, S. Boukind, A. K. Exadaktylos, S. Weiner and S. Ettalbi	2015	Morocco	Others	318	Morocco	2	67	1	33									GCS CT Scan X-Ray	Hemorrhages	Investigate outcomes of TBI
48	Elucidating the neuropsychological profile of apathetic syndrome and disinhibition syndrome in a brain-injured population in Oman	S. Al-Adawi, A. Al-Naamani, Y. Al-Farsi, M. M. c. Essa, D. T. d. Burke, M. a. El-Bouri, K. e. Amstrong, J. e. Edwards, S. a. Al-Muscati, A. S. MacFarland and A. Al Maashani	2016	Oman	Mulitple TBI Causes	54	Oman	37	68.52	17	31.48			4	7	2	3.7	23	43	CT Scan	Hematoma	delineate the cognitive profile that demarcates these two syndromes-disinhibition versus apathetic.	Disinhibited Syndrome Apatehtic Syndrome Neurocognitive and affective functioning Cognitive measures
149	Epidemiology of football injuries in Asia: a prospective study in Qatar	C. Eirale, A. Farooq, F. A. Smiley, J. L. Tol and H. Chalabi	2013	Qatar	Sports and Recreational	217	Qatar							2	1	2	1	0	0			Investigate the occurrence of TBI
74	Epidemiology of head injury in the United Arab Emirates	A. Al-Kuwaiti, A. F. Hefny, A. Bellou, H. O. Eid and F. M. Abu-Zidan	2012	UAE	MVA	589	United Arab Emirates	521	88.3	68	11.5	20	3.39	474	82.2	33	5.7	70	12.1	GCS CT Scan	Hematoma Skull Fractures Type of head injury : Concussion 456 (77.4%) Fractured skull 198( 33.6%) Subdural hematoma 44 (7.5%) Epidural hematoma 33 (5.6%) Subarachnoid bleeding 33 (5.6%) Intracerebral hemorrhage 13( 2.2%) Brain contusion 32( 5.4%) Others 26 (4.4%)	Investigate the occurrence of TBI	tbi prevention uae head road traffic collision
94	Epidemiology of pediatric traumatic brain injury at the Children's Hospital of Tunisia, 2007]	A. Fekih Hassen, M. C. Zayani, M. Friaa, M. Trifa and S. Ben Khalifa	2012	Tunisia	MVA	298	Tunisia	198	67	100	33	6	2	276	93	6	2	16	5	GCS CT Scan	IntraCerebral Lesions	Investigate the occurrence of TBI
95	Epidemiology of school injuries in Alexandria	M. I. Kamel, R. M. Youssef, N. A. Teleb and H. Y. Atta	1998	Egypt	Fall	3422														Surgical	Skull Fractures	safety education should be incorporated in the curriculum and activities involving school children
96	Epidemiology of severe traumatic brain injury (TBI) in pediatric population of the West of Algeria	H. Bouguetof, M. A. Negadi, K. El Halimi, D. Boumendil and Z. C. Mentouri	2012	Algeria	MVA	573													33	GCS		Provide recommendations to government for improving health care delivery to children with severe TBI in the referral region of the university hospital center in Oran.	Children Accidents
97	Epidemiology of traumatic head injury in children and adolescents in a major trauma center in Saudi Arabia: implications for injury prevention	S. Alhabdan, M. Zamakhshary, M. AlNaimi, H. Mandora, M. Alhamdan, K. Al-Bedah, S. Al-Enazi and A. Al-Habib	2013	KSA	MVA	1219		956	78.4	263	21.6	90	7.35							GCS CT Scan Surgical		Determine the major cause examine the severity of head injury, overall trauma severity, types of surgical interventions for involved cases, the inflence of patient body weight on the injury status, and the pattern of outcome for those injuries	Pediatric one third of pediatric admissions following trauma suffred head injury MVC was the major cause of injury obesity
15	Epidemiology, morbidity and mortality from fall-related injuries in the United Arab Emirates	M. Grivna, H. O. Eid and F. M. Abu-Zidan	2014	UAE	Fall	882	United Arab Emirates	727	82	155	18	2	0.2
49	Epilepsy in patients 60 years and above	Y. M. Mousali, T. H. Obeid, H. A. Al-Gahtani, M. A. Al-Janadi, A. A. Attar and H. O. Dammas	2009	KSA	Mulitple TBI Causes	75		56		19
50	Evaluation of the Canadian CT head rule for minor head trauma in a tertiary referral institution	E. A. Elgamal, S. M. El-Watidy, Z. A. Jamjoom, A. Abdel-Raouf, H. b. Hassan, H. c. Alwaraqi and S. c. Al-Malah	2006	KSA	Mulitple TBI Causes	600		120		480										To determine the frequency of utilization, yield for TBI, incidence of missed injuries, and to assess the effectiveness of cranial CT for patients with MHT.	Included in this review were patients above 12 years who sustained acute MHT, defined as witnessed loss of consciousness or amnesia and a Glasgow Coma Scale (GCS) score of 13 or greater.	the effectiveness of cranial CT by retrospectively studying head-injured patients presenting to the accident and emergency (A&E) department in a tertiary referral institution; King Khalid University Hospital, Riyadh, Saudi Arabia.	x	x
25	Evaluation of the death cases occurred as a result of injury during war	B. a. Karaarslan, C. b. Uysal, A. c. Çelikel, Y. d. Atan, M. K. d. Asildaǧ, Z. Tataroǧlu and H. E. Dülger	2014	Syria	Military	352	Syria	311	88.4	41	11.6	42	11.9									In the study, they aimed to describe and analyze demographic characteristics of the deceased cases, quantity and qualifications of the injuries, assessment of the autopsy findings in the light of the latest literature findings	Yes, It was also determined that 21% (n:74) of the cases were below 18 years of age --> Of ALL injuries and NOT TBI specifically Yes the adults constituted 79% (n:278) --> of ALL injuries not TBI specifically Non due to a MVA, None of the patient is Lebanese, ALL were Syrian patients All injuries (Head injuries and other injuries) were WAR related All injuries (Head injuries and other injuries) w…
51	Evaluation of trauma registry data in Asir region	M. Y. Al-Naami, A. A. Sadik and M. A. Adam	2001	KSA	Mulitple TBI Causes	85		85	100	0	0	4	10.81							GCS Surgical			Trauma Registry
52	Experience with brain abscess in the central province of Saudi Arabia	A. Jamjoom, Z. A. Jamjoom, R. Naim Ur, A. Tahan, T. Malabarey and A. Kambal	1994	KSA	Mulitple TBI Causes	22		17	77.2	5	22.7	3	18							Surgical			antimicrobial treatment (14%)
98	Factors affecting anatomical region of injury, severity, and mortality for road trauma in a high-income developing country: lessons for prevention	H. O. Eid, P. Barss, S. H. Adam, F. C. Torab, K. Lunsjo, M. Grivna and F. M. Abu-Zidan	2009	UAE	MVA	1070	Egypt, Oman, United Arab Emirates and Other	952	89	118	11	44	42									Investigate the occurrence of TBI
53	Factors affecting mortality of critical care trauma patients	A. F. Hefny, K. Idris, H. O. Eid and F. M. Abu-Zidan	2013	UAE	Mulitple TBI Causes	202	United Arab Emirates and Other	181	90	21	10	28	14							GCS		Associate TBI with another variable Investigate outcomes of TBI
54	Factors Influencing Rehabilitation Outcome in Adult Traumatic Brain Injury in Qatar	Al Yazeedi W., Venkatachalam L., Bobinac Georgievski A. and S. R.	2010	Qatar	Mulitple TBI Causes	50	Qatar and Other	50	100	0	0			1	2	6	12	39	78			analyzing the factors influencing the functional outcome after TBI in an inpatient rehabilitation unit	Rancho level functional independence measure on admission functional independence measure on discharge
55	Factors predicting early outcome in patients admitted at emergency department with severe head trauma	R. B. I., C. O., C. K., B. M., K. H., C. A. and B. M.	2015	Tunisia	Mulitple TBI Causes	198		177		21										Objective: To determine predictive factors of early mortality among severe traumatic brain injury in emergency department ; x	included all patients with severe traumatic brain injury ; x	The current study aimed to evaluate the incidence and causes of head injury, and to define simple predictive factors that can be used in practice in emergency department as indicators of a poor prognosis ; To determine predictive factors of early mortality among severe traumatic brain injury in emergency	x	x
99	Fall of platelet count in children with traumatic brain injury: is it of value?	H. M. Kamal, H. Sammou, A. A. Mardini and A. Zaitoni	2011	KSA	MVA	74		50	67.5	24	32.4	11	14.9	13	17.6	33	44.6	28	37.8	GCS		to evaluate the fall of platelet count in children with traumatic brain injury (TBI) as a potential predictor for clinical severity and outcome.	All 74 patients patients are below the age of 12 No Adults, none due to wars 59 due to MVA, no nationality specified 15 patients No war injury No No No Not specified public health
100	Families coping with disability due to brain injury in Oman: Attribution to belief in spirit infestation and Ensorcellment	S. Al-Adawi, Z. Al-Busaidi, S. S. Al-Adawi and D. T. Burke	2012	Oman	MVA	2	Oman	2	100	0	0											describe the reactions and adaptation of caregivers in Oman to victims or survivors of brain injury	Cultural beliefs effect on coping with TBI		The totoal number of dead patients is: 6; Of which 5 died within the 1st week of the craniotomy (Probably still in hosp) and one patient died 5 weeks postoperatively due to multi-organ failure (So probably died outside the hosp)
151	Fatal occupational injuries in Jordan during the period 1980 through 1993	A. Z. Rabi, L. W. Jamous, B. A. AbuDhaise and R. H. Alwash	1998	Jordan	Fall	705		691		14								328					Rabi AZ, Jamous LW, Abudhaise BA, Alwash RH. Fatal occupational injuries in Jordan during the period 1980 through 1993. Safety Science. 1998 Apr 1;28(3):177-87.
26	Head and facial injuries due to cluster munitions	Y. Fares, J. Fares and S. Gebeily	2014	Lebanon	Military	417	Lebanon	22	76	7	24											Investigate outcomes of TBI xplore the head and facial injuries and clinical features of a group of Lebanese patients who suffered from a head and/or face injury due to a sub-munition's detonation
27	Head and neck trauma in Iraq and Afghanistan: different war, different surgery, lessons learned	J. Brennan	2013	Afganistan and Iraq	Military	298	Iraq and Other	291		7												The objectives are to compare and contrast the head and neck trauma experience in Iraq and Afghanistan and to identify trauma lessons learned that are applicable to civilian practice.	"Plates/Month IRQ AFG 1. craniofacial/mandibular 4.5 19 2. reconstructive (2.4 mm) 0 3.5" "Pretreatment at level II or level III medical facilities with surgical capabilities occurred in 93% of head and neck trauma patients in Afghanistan (127/136). Consequently, 7% of patients (9/136) were referred directly to the level III medical facility after receiving only level I treatment at the site of i…
145	Head, face and neck camel-related injuries: Biomechanics and severity	M. A. Al-Ali, A. F. Hefny and F. M. Abu-Zidan	2019	UAE	Fall	73	United Arab Emirates and Other	73	100	0	0		3							GCS
101	Hemodynamic and intracranial pressure changes in children with severe traumatic brain injury	A. Abdalla Mohamed, W. Ahmed Ibrahim and T. Fayez Safan	2011	Egypt	MVA	53		32	63	21	27	8	15.09					53	100	GCS			Severe Traumatic Brain Injury Pediatrics Intracranial Pressure Cerebral perfusion pressure
75	In-depth analysis of pedestrian crashes in Riyadh	N. Al-Shammari, S. Bendak and S. Al-Gadhi	2009	KSA	MVA	501	Saudi Arabia	496	90	5	10	151	27.4									aims at analyzing pedestrian collisions with regard to their causes and characteristics in the city of Riyadh, determining the distribution of injuries in the victims' bodies, and analyzing the characteristics of pedestrians and drivers involved in RTAs	ksa pedestrian road trafic accisdents
102	In-hospital mortality among patients injured in motor vehicle crashes in a Saudi Arabian hospital relative to large U.S. trauma centers	S. Alghnam, M. Palta, A. Hamedani, P. L. Remington, M. Alkelya, K. Albedah and M. S. Durkin	2014	KSA	MVA	5290		4523	85.5	767	14.5	899	17							CT Scan			Increased mortality due to traffic crash injuries in KSA
103	Incidence and severity of head and neck injuries in victims of road traffic crashes: In an economically developed country	A. Bener, Y. S. A. Rahman and B. Mitra	2009	Qatar	MVA	5763		4950	85.9	813	14.1											Preliminary trauma findings
41	Incidence, etiology, and patterns of maxillofacial traumas in Syrian patients in Hatay, Turkey: A 3 year retrospective study	C. Arli, M. Ozkan and A. Karakus	2019	Syria	Military	80	Syria	76		4											0.05	4		aimed to assess the demographics, clinical characteristics, patient treatment, outcome, and costs of maxillofacial trauma cases from Syrian civil war, who were admitted to the Emergency Department in the province of Hatay.
146	Injuries from falling objects in the United Arab Emirates	M. Grivna, H. O. Eid and F. M. Abu-Zidan	2015	UAE	Fall	149	United Arab Emirates	145	97	4	33	2	1.3									Investigate outcomes of TBI Investigate the occurrence of TBI			x
104	Interventions in polytrauma in the Kingdom of Saudi Arabia. A study of 310 polytraumatised patients	A. Beeko, M. Ramsen, O. al Baz and H. Khayat	1989	KSA	MVA	310							39								a.FRACTURED LIMBS (SINGLE MUTIPLE) 30% B. MAXILLO FACIAL INJURIES 28% C. CHEST INJURIES (FRACTURED RIBS WITH HAEMOTHORAX HAEMATO-THORAX)18% D. SPINAL INJURIES 9% E. ABDOMINAL INJURIES 7% F. COMBINATION OF A, B, and C 4% G. COMBINATION OF C AND D 4% I. PERIPHERAL NERVE INJURIES 2%	NA	ksa polytrauma road traffic acidnts fall nurosurgery craniotomy thoracotomy mortlity
28	Intracranial infection after missile injuries to the brain: report of 30 cases from the Lebanese conflict	J. M. Taha, F. S. Haddad and J. A. Brown	1991	Lebanon	Military	600	Lebanon													GCS		Associate TBI with another variable How to Deal with TBI	Age group of the studied population was not specified
56	Intracranial pressure monitoring in head injury: Its first use in Kuwait	A. Adeloye, N. Kouka, M. R. Al-Saigh, A. G. Elgohary and M. S. Al-Manee	1990	Jordan	Mulitple TBI Causes	67		51	76.12	16	23.88	25	37.31							GCS CT Scan	Hematoma Brain Edema Contusion		multi-trauma ICP (IntraCranial Pressure) monitoring
105	Intracranial Pressure Monitoring, Experience in Jordan University Hospital	A. Musharbash, Qussai Saleh, Ahmed Tamimi, Moh'd Abu-Elrub, Walid Maani "	2010	Kuwait	MVA	20		18	90	20	10	3	15							GCS	Hematoma Brain Edema 14: Moderately Severe Brain Oedema 6: Sever Brain Oedema 4: Intraventricular Haematoma 3: Acute Subdural Haematoma 3: Extradural Haematoma 1: Chronic Extradural Haematoma 1: Intracerebral Haematoma 1: Extradural Haematoma, Intracerebral Haematoma 1: Extradural Haematoma, Intraventricular Haematoma		ICP monitoring evaluation extradural technique
106	Long term outcome following mild traumatic brain injury in Moroccan patients	M. Fourtassi, A. Hajjioui, A. E. Ouahabi, H. Benmassaoud, N. Hajjaj-Hassouni and A. E. Khamlichi	2011	Morocco	MVA	42	Morocco	37	88	5	12			24	100	0	0	0	0	GCS		Investigate outcomes of TBI
18	Management of missiles injuries of the facial skeleton: primary, intermediate, and secondary phases	R. Kummoona	2010	Iraq	Military	235	Iraq	195	83	40	17									Surgical		The Author aims to: Share with other Surgeons the methods of management of missile Injuries of the facial skeleton due to his high expertise as a surgeon working in Baghdad with such a huge number of facial damage and injury caused by missliles	The Age groups of patients with head injury was not reported The Age groups of patients with head injury was not reported; Yes ALL 33 injuries were war related (missiles) Non Due to MVA (All were War-related);No nationality reported, however most of them seem to be Iraqi Civilians Non due to Falls (All were war related) No, ALL are war related Yes, ALL 33 injuries were mediated by a missile and t…		42
57	Management of severe paediatric trauma brain injury (PTBI) guided by intracranial pressure (ICP) monitoring in a picu in algeria	Bouguetof, H; Negadi, MA; Halimi, K El; Boumendil, D; Mentouri, ZC	2012	Algeria	Mulitple TBI Causes	308														GCS		Evaluate the management of PTBI based on continues monitoring of intraparenchymal ICP in a PICU in Algeria		'PTBI is the leading cause of death and long-term morbidity.	NA
58	Mortality reduction after implementing a clinical practice guidelines-based management protocol for severe traumatic brain injury	Y. M. Arabi, S. Haddad, H. M. Tamim, A. Al-Dawood, S. Al-Qahtani, A. Ferayan, I. Al-Abdulmughni, J. Al-Oweis and A. Rugaan	2010	KSA	Mulitple TBI Causes	434		412	95.8	22	5.2	88										The objective of this study was to examine the effect of implementing a clinical practice guidelines-based management protocol on the outcome of patients with severe traumatic brain	gsc isis icp monitoring Mortality reduction based management protocol "clinical practice guidelines" icu svere tbi
107	Motor vehicle injuries in childhood: a hospital-based study in Saudi Arabia	S. J. Crankson	2006	KSA	MVA	1598		469	71	195	29	34	5.1	194	56	100	26	93	24			This study suggests that nationwide programs should target the use of seatbelts and helmets, and dangerous driving practices	KSA CHILDREN Pedestrian, PASSENGER BICYCLIST MOTORCYCLIST MVA TBI HEAD INJURY AND POLYTRAUMA SURGERY
108	Motorcycle-related injuries in the United Arab Emirates	A. F. Hefny, P. Barss, H. O. Eid and F. M. Abu-Zidan	2012	UAE	MVA	39	United Arab Emirates and Other	93	98	2	2	6	6							GCS		Investigate outcomes of TBI Investigate the occurrence of TBI
59	Neurogenic pulmonary edema due to traumatic brain injury: evidence of cardiac dysfunction	M. Bahloul, A. N. Chaari, H. Kallel, A. Khabir, A. Ayadi, H. Charfeddine, L. Hergafi, A. D. Chaari, H. E. Chelly, C. Ben Hamida, N. Rekik and M. Bouaziz	2006	Tunisia	Mulitple TBI Causes	7		7	100			4	57.14							GCS CT Scan	Hematoma Hemorrhages Brain Edema Contusion Pneumocephalus 2/7---Mass lesion 3/7---Herniation 2/7	Associate TBI with another variable The aim of this study was to explore myocardial function in patients with evident NPE after traumatic head injur	tbi pulmonary edema cardic dysfunction echocardiography pulmonary artery catherization gcs icu brain ct
60	Neuromarkers as diagnostic adjuvant to cranial CT in closed traumatic brain injury patients admitted to ICU: A preliminary comparative study	H. A. Shehab and Y. H. Nassar	2010	Egypt	Mulitple TBI Causes	70	Egypt	52	74	18	26									CT Scan	Hematoma Hemorrhages	Associate TBI with another variable to find out if certain neuromarkers can be helpful as diagnostic adjuvant to cranial CT in closed traumatic brain injury patients admitted to ICU	No children, because the article states that ages of the patients ranged from 22 to 64. All the patients were adults, ages ranged from 21 to 65 years; The specific causes of the Brain injuries were NOT REPORTED
139	Occupational fatalities in Jordan	E. M. Al-Abdallat, A. M. Oqailan, R. Al Ali, A. A. Hudaib and G. A. Salameh	2015	Jordan	Fall	88		87	98.86	1	1.14	19	21.59										Head injury was the higherst rated type of injury among occupational fatalities
140	Occupational injury in the United Arab Emirates: epidemiology and prevention	P. Barss, K. Addley, M. Grivna, C. Stanculescu and F. Abu-Zidan	2009	UAE	Fall	614	Egypt, United Arab Emirates, and Other	602	98	12	2							8	5	GCS		Determine the major cause Investigate outcomes of TBI Investigate the occurrence of TBI	"occupational injuries were frequent, with two-thirds of hospitalizations resulting from falls or falling objects."
109	Outcome analysis and outcome predictors of traumatic head injury in childhood: Analysis of 454 observations	M. Bahloul, A. Chaari, I. Chabchoub, F. Medhyoub, H. Dammak, H. Kallel, H. Ksibi, S. Haddar, N. Rekik, H. Chelly and M. Bouaziz	2011	Tunisia	MVA	454		313	68.9	141	31.1	82	18.1							CT Scan	Hematoma Hemorrhages Skull Fractures Brain Edema Contusion Cerebral trunk injury 20 (4.4)	Investigate outcomes of TBI	TBI tunisia outcome GOS children icu factors predictors
30	Outcome of Craniocerebral Penetrating Injuries: Experience from the Syrian War	M. A. Jamous	2019	Syria	Military	44	Syria	38	86	6	14	11	25	18	41	6	14	20	45	GCS CT Scan Surgical	Hemorrhages Skull Fractures Brain Edema performed for all patients. No percentages given for specific findings. Does mention skull fractures, intracranial hemorrhage, brain injuries and brain edema was present in all patients
61	Outcome one year post severe traumatic brain injury: About a Tunisian population	S.Boudokhane S., Migaou H., Salah S., Jellad A. and B. S. F. Z.	2015	Tunisia	Mulitple TBI Causes	50	Tunisia	38	76	12	24											Investigate outcomes of TBI Investigate the occurrence of TBI investigate the epidemiological characteristics, functional and socio-professional outcome of a population of individuals one year after a severe traumatic brain injury
110	Pattern and outcome of pediatric head injuries in the Suez Canal Region: A follow-up study	H. Atwa, N. AbdAllah and H. Abd El Gawad	2017	Egypt	MVA	70	Egypt	41	59	29	41				81		13		6	GCS CT Scan Surgical	Hematoma Skull Fractures Brain Edema Contusion
111	Pattern of acute head injuries in Kuwait	A. Adeloye, N. al-Kuoka and G. C. Ssembatya-Lule	1996	Kuwait	MVA	206		164	79.61	42	20.39	7	3.4	153	74.27	0	0	53	25.73	GCS CT Scan Surgical	Hematoma Brain Edema Positive CT in 53 patients: 4: basal fractures 1: significant subdural haematoma 11: generalized brain oedema 6: brain confusion 2: Pneumocephalus 29: Intracranial haematomas: Intracerebral: 12 Extradural:7 Intraventricular: 5 Sudural: 5		Severe and Mild head Injury
112	Pattern of craniofacial injuries in patients admitted to Tanta University Hospital - Egypt	N. A. Hassan, R. S. E. Kelany, A. M. Emara and M. Amer	2010	Egypt	MVA	255	Egypt	216	85	39	15	6	2	211	83	32	13	11	4	GCS		Determine the major cause Investigate outcomes of TBI Investigate the occurrence of TBI
16	Pattern of homicide in eastern province of Kingdom of Saudi Arabia	O. M. Al Madani, M. A. A. Kharosha, M. K. Zaki, M. A. S. Youssef and O. P. Murty	2009	KSA	Fall	125	Saudi Arabia and Other	104	83.2	21	16.8												Homicide
9	Pattern of skeletal injuries in physically abused children	F. Al-Mahroos, E. A. Al-Amer, N. J. Umesh and A. I. Alekri	2011	Bahrain	Assault/Violence	36		23	64	13	36										Skull Fractures Types of Bone Fractures and Victims' Age Type of Fracture Number (%) Age ≤ One YearNumber (%) Femur 10 (28) 5 (50) Skull 9 (25) 7 (78) Humerus 8 (22) 5 (62) Rib 6 (17) 6 (100) Radius 4 (11) 4 (100) Ulna 4 (11) 4 (100) Tibia 2 (6) 2 (100)	Investigate the occurrence of TBI	child abuse bahrain bone fracture femur, skull, rib fracture
113	Patterns of brain injuries associated with maxillofacial fractures and its fate in emergency Egyptian polytrauma patients	A. H. Elbaih, D. A. El-Sayed, A. E. Abou-Zeid and G. K. Elhadary	2018	Egypt	MVA	90	Egypt	57	63	23	37		7	30	33	39	43	21	23	CT Scan Surgical	Hemorrhages Brain Edema Contusion 50% epidural hemorrhage, 13.3% subdural hemo, pneumocephalis 3.4%, brain edema 10%, diffuse axonal injury 10%, contusion 13.3.%
4	Patterns of pediatric trauma in Ramadan: An observational study	M. Alnasser, N. AlSelaim, S. Aldhukair, K. a. Elbedah, H. b. Tamim, c, , S. a. Alazzam, T. a. AlTokhais, S. Alenazi and M. Zamakhshary	2012	KSA	Assault/Violence	3766	Saudi Arabia					117	3.1									to compare the pattern of trauma in Ramadan months with trauma in non-Ramadan months in a level one trauma center.	CHILDREN mva ramadan non ramadan saudi arabia head trauma vascular trauma orthopedic trauma blunt and penetrating trauma		Not specified ( Most cases with high- or low-velocity riﬂe injuries to the head and brain damage usually did not survive)
114	Patterns, Types, and Outcomes of Head Injury in Aseer Region, Kingdom of Saudi Arabia	I. Alnaami, S. Alshehri, S. Alghamdi, M. Ogran, A. Qasem, A. Medawi, A. Medawi, S. Alshahrani and L. Sarhan	2019	KSA	MVA	353	Saudi Arabia	308	87.3	45	12.7	9	2.5	39	11	149	42.2	165	46.7	CT Scan Surgical	Contusion epidural h 23%, subdural h 18%, subarachnoid h 20%, contusion 19%, intraventricular h 12%
115	Pedestrian injuries in the United Arab Emirates	A. F. Hefny, H. O. Eid and F. M. Abu-Zidan	2015	UAE	MVA	318	United Arab Emirates	279	88	39	12	30	9									Investigate the occurrence of TBI
116	Pediatric and youth traffic-collision injuries in Al Ain, United Arab Emirates: a prospective study	M. Grivna, H. O. Eid and F. M. Abu-Zidan	2013	UAE	MVA	245	United Arab Emirates	193	79	52	21									GCS		Determine the major cause Investigate outcomes of TBI
117	Pediatric trauma: experience of a combat support hospital in Iraq	R. McGuigan, P. C. Spinella, A. Beekley, J. Sebesta, J. Perkins, K. Grathwohl and K. Azarow	2007	Iraq	Military	99	Iraq	76	76.7	23	23.3	9						11.6				report the experience of the 31st CSH treating pediatric trauma patients
118	Pediatric Traumatic Brain Injury: a 5-year descriptive study from the National Trauma Center in Qatar	A. El-Menyar, R. Consunji, H. Al-Thani, A. Mekkodathil, G. Jabbour and K. A. Alyafei	2017	Qatar	MVA	167	Qatar	136	81	31	19	22	13	20	12.2	37	22.6	107	65.2	GCS Surgical	Hemorrhages Skull Fractures Contusion Skull fracture (61.7%) and brain contusion (49.7%) were the most frequent CT scan findings followed by brain edema (30.7%), subarachnoid hemorrhage (24.2%), subdural hemorrhage (24%), and epidural hemorrhage (13.8%)	to describe the hospital-based epidemiologic characteristics, injury mechanisms, clinical presentation, and outcomes of pTBI and analyze key characteristics and determinant of pTBI that could help to make recommendations for policies to improve their care.			1
31	Pediatric wartime admissions to US military combat support hospitals in Afghanistan and Iraq: learning from the first 2,000 admissions	K. M. Creamer, M. J. Edwards, C. H. Shields, M. W. Thompson, C. E. Yu and W. Adelman	2009	Afghanistan and Iraq	Military	2060		1627		433											NA		NA	NA
32	Penetrating missile head injuries: Personal experiences during the Lebanese conflict	F. S. Haddad	2002	Lebanon	Military	527	Lebanon	431		96
154	Penetrating missile injuries in the Gulf war 1991	T. J. Spalding, M. P. Stewart, D. N. Tulloch and K. M. Stephens	1991	Kuwait	Military	4
63	Plasma D-dimer as a Prognostic Marker in ICU Admitted Egyptian Children with Traumatic Brain Injury	H. M. Foaud, J. R. Labib, H. G. Metwally and K. M. El-Twab	2014	Egypt	Mulitple TBI Causes	46		26	57	20	43	19	48							CT Scan	Hematoma Hemorrhages	Associate TBI with another variable
119	Post traumatic epilepsy due to traumatic brain injury by traffic accidents in neurophysiological explorations laboratory of Marrakesh University Hospital	A. Chahidi, N. Adali, N. Louhab, I. Hajjaj and N. Kissani	2014	Morocco	MVA	385												9	45	CT Scan	Hematoma Hemorrhages Skull Fractures Contusion	analyze some characteristics of PTE cases secondary to TBI caused by traffic accidents in the area of Marrakesh city.	Traffic accidents	Male predominance PTE diagnostic delay was of 4 years after the accident
147	Post-traumatic camel-related benign paroxysmal positional vertigo	G. Ralli, F. Atturo, A. Lamberti and G. Nola	2010	Morocco	Sports and Recreational	2		1		1									60		NA	study two cases of Italian patients suffering from vertigo after they fell from a camel during a visit to the Middle East	NA	2
120	Posttraumatic epilepsy in Tunisia	H. M. Khiari, M. Kechaou, A. Banasr, B. Zouari, M. Hamdoun and A. Mrabet	2011	Tunisia	MVA	28	Tunisia	25	89.2	3	10.8	0	0	6	21.43	11	39.3	11	39.3	CT Scan	Hematoma Skull Fractures Contusion	To show the insuffiecient Tunisian law on this protecting victims of posttraumatic epilepsy and the requirements for better assessment	8 children, post TBI epilepsy 23 Adult, sequelae 18, road traffic accidents
43	Potential brain death organ donors - challenges and prospects: a single center retrospective review	Y. Al-Maslamani, A. S. Abdul Muhsin, O. I. Mohammed Ali, R. A. Fadhil and A. H. Abu Jeish	2014	KSA	Mulitple TBI Causes	116	Qatar	86	82.75	20	17.25											evaluate various demographic criteria and challenges of organ donation among potential BD organ donors and plan a strategy to improve the rate of organ	organ qatar
121	Predictors and Time-Based Hospital Mortality in Patients with Isolated and Polytrauma Brain Injuries	A. El-Menyar, R. Consunji, H. Abdelrahman, R. Latifi, B. M. Wahlen and H. Al-Thani	2018	Qatar	MVA	810	Qatar	753	93	57	7	217	27							CT Scan Surgical	Brain Edema SDH 250 (31%), EDH 133 (16.4%), SAH 267 (33%), brain edema 230 (28.4%)	We aim to report the predictors and temporal patterns of death in moderate-to-severe isolated and polytrauma brain injuries in relation to their admission to the only national level 1 trauma center.
76	Prehospital versus Emergency Room Intubation of Trauma Patients in Qatar: A-2-year Observational Study	H. Al-Thani, A. El-Menyar and R. Latifi	2014	Qatar	MVA	482		455	94.3	27	5.6	171	35.5							GCS		The present study analyzed the outcome of PHI versus emergency room intubation (ERI) among trauma patients in Qatar.
122	Profile of road traffic accidents'related head injuries in alexandria during the egyptian revolution 2011	O. S. Abdelaziz, M. N. Elwany, M. A. Abbassy and M. S. Mostafa	2015	Egypt	MVA	970		756	77.94	214	22.06	78	9.3	774	79.79	59	6.08	137	14.12	GCS CT Scan Surgical	Hemorrhages Brain Edema Contusion Findings of CT (n = 935): Unremarkable: 635 (67.9%) Positive findings: 300 (32.1%) Types of positive findings (n = 300): Brain edema 94 (31.3%) Hemorrhagic contusions 85 (28.3%) Extradural hemorrhage (EDH) 90 (30.0%) Subdural hemorrhage (SDH) 61 (20.3%) Midline shift (MLS) 33 (11.0%) Single fissure fractures 68 (22.7%) Depressed fractures 17 (5.7%) Fractures 94 (…		Road Traffic Accidents Egypt Revolution 2011
123	Prognosis of traumatic head injury in South Tunisia: a multivariate analysis of 437 cases	M. Bahloul, H. Chelly, M. Ben Hmida, C. Ben Hamida, H. Ksibi, H. Kallel, A. Chaari, M. Kassis, N. Rekik and M. Bouaziz	2004	Tunisia	MVA	437	Tunisia	393	90	44	10		29						13.27	CT Scan	Hematoma Hemorrhages Contusion Subfalcine Herniation Pneumocephalus 38 (8.7%) Mass lesion 86 (19.7%) Brain herniation 21 (4.8%) Normal CT scan 15 (3.4%) Cerebral trunk injury 12 (2.7%)	to determine predictive factors of mortality after posttraumatic brain injury	"correlated with death in univariate analysis Parameters Survivors (%) Deaths(%) Age 40 years 30 48 SAPS II 40 26.8 74 ISS 20 81.6 96.8 Shock 14.8 26 Cardiac arrest 1.9 7.8 Respiratory distress 20.3 30 Glasgow Coma Score <10 61.6 80.5 Bilateral mydriasis 4.8 26 Anisocoria 11.6 25 Neurovegetative disorders 16.4 43.3 Meningeal hemorrhage 42.6 63 Subdural hematoma 9 35.4 Cerebral contusion 36.8 50.4…
33	Radiology of terror injuries: the American University of Beirut Medical Center experience	M. C. Haddad, N. J. Khoury and M. H. Hourani	2008	Lebanon	Military	28	Lebanon	23	82	5	18							2	16	CT Scan	Hematoma Hemorrhages Brain Edema	Associate TBI with another variable
10	Rehabilitation of torture survivors in five countries: common themes and challenges	H. McColl, C. Higson-Smith, S. Gjerding, M. H. Omar, B. A. Rahman, M. Hamed, A. S. El Dawla, M. Fredericks, N. Paulsen, G. Shabalala, C. Low-Shang, F. V. Perez, L. S. Colin, A. D. Hernandez, E. Lavaire, A. P. A. Zuniga, L. Calidonio, C. L. Martinez, Y. Abu Jamei and Z. Awad	2010	Egypt and Palestine	Assault/Violence	116		65		51
34	Retrospective Study of Injuries in Military Parachuting	D. Dhar	2007	Oman	Fall	150		150	100	0	0										Skull Fractures Contusion Type of injuries (n=150) Injury Number - (%) Fractures 40 - 26.7% Head injuries 5 -3.3% Abdomen / Thorax 3 - 2% Contusion /Sprains 90 - 60% Spinal injuries 12 -8%	to obtain a profile of the injuries and risk factors for paratroopers from Gulf region and compare them with those of other western studies.	military parashute fracture fractures and knee ligament ruptures oman	"hospitalisation period varied from 3 - 20 days (average 12.2 days" "Age (years) Number of cases (%) 18 - 25 9 5( 63.3%) 26 - 35 55 (36.6%)" Head injuries 5 (3.3%) "Cause of parachuting injuries: Improper jumps from aircraft ( 3) Improper landing ( 53) Rough landing terrain (10) Windy weather ( 8) Improper parachute handling ( 25) Exact cause could not be ascertained ( 5 1)" overall admission rat…
125	Road traffic accidents and the elderly	S. Abou-Raya and L. A. ElMeguid	2009	Egypt	MVA	258		139	53.88	119	68.7											identification and evaluation of the causes and characteristics of RTA and the analysis of the injury patterns in elderly road traffic victims	Vulnerable population (elderly) Road Traffic Accidents Craniocerebral and extremity injuries formed the majority of the injuries in pedestrian and cyclist victims whereas chest injuries were commoner in car accident victims		Primary Cause ofPediatric Deaths Afghanistan,n (%)Iraq,n (% Total,n (%) Head injury 16 (20.5) 25 (41) 41 (29.5)
64	Save the patient a trip. Outcome difference between conservatively treated patients with traumatic brain injury in a nonspecialized intensive care unit vs a specialized neurosurgical intensive care unit in the Sultanate of Oman	A. M. Al-Kashmiri, S. Z. Al-Shaqsi, A. S. Al-Kharusi and L. A. Al-Tamimi	2015	Oman	Mulitple TBI Causes	174		144	82.76	30	17.24	48	27.6	0	0	0	0	174	100	GCS CT Scan Surgical	Hematoma Hemorrhages Skull Fractures Brain Edema Contusion Craniomaxillofacial Fracture 9 (12.2%) 8 (8.0%) Diffuse Axonal Injury 6 (1.0%) 4 (4.0%)	Investigate outcomes of TBI	ICU severe tbi Comparison between general ICU and specialized neurosurgical ICU
126	Severe head injury among children: prognostic factors and outcome	M. Bahloul, C. Ben Hamida, H. Chelly, A. Chaari, H. Kallel, H. Dammak, N. Rekik, K. Bahloul, K. Ben Mahfoudh, M. Hachicha and M. Bouaziz	2009	Tunisia	MVA	222		163	73.4	59	26.6	54	24.3					222	100	GCS		Investigate outcomes of TBI	severe tbi tunisia children mva ct brain predictors of death outcome complications
36	Severe Pediatric Head Injury During the Iraq and Afghanistan Conflicts	P. Klimo, Jr., B. T. Ragel, G. M. Jones and R. McCafferty	2015	Iraq	Military	647	Iraq and Other	492	76	182	24	156	24.1							GCS		Investigate outcomes of TBI	pediatrics head injury iraq afgaistan conflicts and wars gcs open and penetrating injuries araiotomy or craniectomy		0
37	Surgical management of penetrating intracranial bullet injuries	S. Sakr, A. Azzazi, A. Elsayed and H. Fathalla	2016	Egypt	Assault/Violence	30	Egypt	24	80	6	20			15	50	3	10	12	40	GCS CT Scan		Investigate outcomes of TBI
141	Ten self-inflicted intracranial penetrating nail gun injuries	S. J. Yuh and A. Alaqeel	2015	KSA	Assault/Violence	1	Saudi Arabia	1	100											CT Scan Surgical	Foreign Bodies	Associate TBI with another variable How to Deal with TBI
77	The coagulopathy in acute head injury: Comparison of cerebral versus peripheral measurements of haemostatic activation markers	W. R. Murshid and A. G. M. A. Gader	2002	KSA	MVA	17		12	88	5	12	4	24							GCS CT Scan	Hematoma Hemorrhages Brain Edema Contusion	"The aim of this study was to characterize more precisely the coagulopathy complicating head injury by monitoring a wide range of haemostatic markers including F1 + 2,TAT and D-dimer, in the jugular, arterial and peripheral venous blood, daily up to 4 days after the injury. "	5 patients were <18 years of age, 3 were <16 years of age 12 patients are older than 18 years of age and 14 are older than 16 years of age, Non is War related injury Nationality of the subjects was not reported,All TBIs are due to MVA None None None None None No, Kingdom of Saudi Arabia Nationality not specified Nationality not specified
127	The epidemiology of road traffic accidents in Jordan	K. S. Jadaan	1989	Jordan	MVA	1350	Jordan		96		4	69	5		46		18		36	GCS
128	The ICU outcome of head injury in Basrah, Iraq	S. N. Asfar, M. AbdulKhadir and F. H. Thejeel	1996	Iraq	Mulitple TBI Causes	60		51	95	9	5	22	36.6	31	51.66	12	20	17	28.3	GCS		to define the special gps who are vulnerable to head injury, to assess the nb and nature of morbidity and mortality of head injuerd casses admitted to the icu, to estimate the factors that influence and determine the outcome of yhose patients, to evaluate our routine management	iraq head injury GCS OUTCOME MORTALITY
129	The impact of four-wheel drives on road traffic disability and deaths compared to passenger cars	A. Bener, A. Ghaffar, A. Azab, M. Sankaran-Kutty, F. Toth and G. Lovasz	2006	UAE	MVA	1138	United Arab Emirates and Other	874	76.8	264	23.1										to examine the pattern of injuries resulting from road traffic crashes involving four wheel drives (4WD) vehicles and passenger cars in the United Arab Emirates (UAE		"fatal injury, as reported by casualty doctor, includes death upto 28 days after crash, although an estimated 2% of deaths occur after 28 days" RTA 4WD SMALL CARS OLYTRAUMA TIME OF CRASHS VIOLATION CARLESS DRIVING AIS		0, the study was about patients who SURVIVED TOURTURE and was conducted in centers (OUTSIDE the hospital)
66	The ineffectiveness of the Hospital Anxiety and Depression Scale for diagnosis in an Omani traumatic brain injured population	S. Al-Adawi, A. S. Dorvlo, A. Al-Naamani, M. B. Glenn, N. Karamouz, H. Chae, Z. A. Zaidan and D. T. Burke	2007	Oman	Mulitple TBI Causes	68		47		21										screen and detect the prevalence of anxiety and depressive states among both male and female patients with TBI in an urban, Arab/Islamic country, Oman	Patients who had sustained a TBI and were referred to the Sultan Qaboos University Hospital for assessment of neurocognitive functioning	assess the validity of the Arabic version of HADS as a screening instrument for a TBI population by comparing it with the semistructured interviews, CIDI based on the International Classification of Disease (ICD-10)	NA	68
67	The outcome of head injuries: the Saudi experience	A. Wahab, M. Ibrahim, U. M. Chowdhary, A. Ammar and E. M. Ibrahim	1989	KSA	Mulitple TBI Causes	198	Saudi Arabia	177	89	21	11	42	21							GCS		Investigate outcomes of TBI
130	The role of seating position in determining the injury pattern among unrestrained children involved in motor vehicle collisions presenting to a level I trauma center	A. Al-Jazaeri, M. Zamakhshary, A. Al-Omair, Y. Al-Haddab, O. Al-Jarallah and R. Al-Qahtani	2012	KSA	MVA	89		64	71.91	25	28.09									GCS			MCV Unrestrained Children in motor vehicles Pediatric crash characteristics
153	The siege of Tripoli 1983: war surgery in Lebanon	E. Fosse, H. Husum and C. Giannou	1988	Lebanon	Military	6
68	Time-based trauma-related mortality patterns in a newly created trauma system	H. Abdelrahman, A. El-Menyar, H. Al-Thani, R. Consunji, A. Zarour, R. Peralta, A. Parchani and R. Latifi	2014	Qatar	Mulitple TBI Causes	333		316	94.89	17	5.11											describe and analyze the time-based distribution and risk factors of trauma-related mortality in the only level I trauma center in the State of Qatar	Trauma center head injury increased the risk for late death four times Pre hospital and early deaths RTIs are the most common cause of trauma related death		158 out of the TOTAL 647 (BOTH Iraqis and Afghanis, Iraqis alone were not specified)
69	Trauma patterns in patients attending the Emergency Department of Jazan General Hospital, Saudi Arabia	E. Hokkam, A. Gonna, O. Zakaria and A. El-Shemally	2015	KSA	Mulitple TBI Causes	66	Saudi Arabia	42		24		27	2.6									Investigate outcomes of TBI
131	Trauma profile at a tertiary intensive care unit in Saudi Arabia	A. S. Aldawood, M. Alsultan, S. Haddad, S. M. Alqahtani, H. Tamim and Y. M. Arabi	2012	KSA	MVA	1659		1544	93.07	115	6.93									GCS CT Scan		NA	Motor Vehicle Accidents dominant cause of trauma MVAs are associated with the most severe cases of head injury and are the most common cause of death
132	Traumatic Acute Brain Herniation through the Ear in a Child: Concealed compound fracture	R. Kariyattil and U. Muthukuttiparambil	2012	Oman	MVA	1		0	0	1	100									GCS CT Scan Surgical	Skull Fractures the occipital bone and an oblique fracture of the right petrous bone sparing the otic capsule + a fracture of the basisphenoid with blood in the sphenoid and ethmoid sinuses+ evidence of pneumocephalus in the frontal region and basal cisterns	How to Deal with TBI Reporting a very rare case of brain herniation from the ear following a TBI and it's management	1 child, 7-year-old female, child No adults, not war injury related, brain herniation MVA induced , nationality unspecified, otorrhea YES 1 case, no sequelae		4
70	Traumatic and non-traumatic coma in children in the referral hospital, Al-Hasa, Saudi Arabia	A. M. Ali, A. Al-Abdulgader, H. M. Kamal and A. Al-Wehedy	2007	KSA	Mulitple TBI Causes	91		59	64.84	32	35.16	17	35.42							GCS		Determine the major cause Investigate outcomes of TBI Investigate the occurrence of TBI	coma pediatrics
133	Traumatic brain injuries from work accidents: a retrospective study	A. M. Salem, B. A. Jaumally, K. Bayanzay, K. Khoury and A. Torkaman	2013	UAE	Fall	581	Egypt and Syria	581	100	0	0											Investigate outcomes of TBI
44	Traumatic brain injury in pediatric age group; predictors of outcome in Pediatric Intensive Care Unit	H. Kamal, A. Mardini and B. M. Aly	2007	KSA	Mulitple TBI Causes	106		65		41										Use the studied parameters ( Glasgow coma score, brain CT findings, combined brain pathologies, hypotension, high liver enzymes and low serum albumin) in the prognosis of head trauma the pediatric age group	N/A	The aim is to prove whether or not the following parameters: Glasgow coma score, brain CT findings, combined brain pathologies, hypotension, high liver enzymes and low serum albumin are good predictors of outcome	N/A	N/A
134	Traumatic brain injury in the Gaza Strip: adults and children and their caregiver disability burden	Z. M. Hawamdeh, A. I. Ibrahim and A. A. Mezher	2011	Palestine	Mulitple TBI Causes	100	Palestine	77	77	23	23									GCS		Investigate outcomes of TBI determine disability
38	Traumatic brain injury, polytrauma, and pain: challenges and treatment strategies for the polytrauma rehabilitation	R. J. Gironda, M. E. Clark, R. L. Ruff, S. Chait, M. Craine, R. Walker and J. Scholten	2009	Iraq	Military	28	Lebanon	23	82	5	18							2	17			Investigate outcomes of TBI
39	Traumatic head injury in children in south Tunisia epidemiology, clinical manifestations and evolution. A propos 454 cases	M. Bahloul, H. Chelly, R. Gargouri, H. Dammak, H. Kallel, C. B. Hamida, N. Rekik, K. B. Mahfoudh, R. Rebaii, M. Hachicha and M. Bouaziz	2009	Tunisia	MVA	454		313	68.9	141	31.1									CT Scan Surgical		To determine epidemiological causes, clinical and Para clinical manifestations and outcome in children with traumatic head injury in south Tunisia.	Traffic incidents children
135	Traumatic subarachnoid hemorrhage due to motor vehicle crash versus fall from height: a 4-year epidemiologic study	A. Parchani, A. El-Menyar, H. Al-Thani, A. El-Faramawy, A. Zarour, M. Asim and R. Latifi	2014	Qatar	MVA	403	Qatar and Other	381	93	22	5.6	75	18.6							GCS Surgical	Hemorrhages Contusion	Investigate outcomes of TBI investigate the pattern and outcome of TSAH in 2 subsets of patients with regard to mechanism of injury (MOI) either motor vehicle crash (MVC) or fall from height (FFH) as both are the common MOIs in our region
136	Trends and Characteristics of Head and Neck Injury from Falls: A hospital based study, Qatar	A. Bener, Y. S. Abdul Rahman, E. Y. Abdel Aleem and M. K. Khalid	2011	Qatar	Fall	1952		1691	86.6	261	13.4			1619	82.9	186	9.5	147	7.5	GCS		determine the trends of head and neck injuries from falls in absolute number, incidence and pattern of injuries during the period 2001 to 2006	QATAR INCIDENCE HEAD AND NECK INJURY OCCUPATIONAL FALL INJURY HOME FALLS ELDERLY CHILDREN GCS FALLER'S ACATIVITY GCS
137	Trends and characteristics of injuries in the State of Qatar: hospital-based study	Bener, A., Abdul Rahman, Y. S., Abdel Aleem, E. Y., Khalid, M. K. (2012). Trends and characteristics of injuries in the State of Qatar: hospital-based study. International Journal of Injury Control and Safety Promotion, 19(4), 368-372. doi:10.1080/17457300.2012.656314	2012	Qatar	MVA	53366	Qatar and Other	46701	87.5	6665	12.5									GCS		to determine the trend in the number, incidence and pattern of injuries in the State of Qata	QATAR HEAD INURY MULTIORAN INJURY RTA OCCUPATIONAL INJURY FALL SPORTINURY CONSTRUCTION WORK INJURY GCS
138	Utility of bispectral index in the management of multiple trauma patients	S. Mahmood, A. Parchani, A. El-Menyar, A. Zarour, H. Al-Thani and R. Latifi	2014	Qatar	MVA	110		105	97	5	3								23.1	GCS		assess the utility of BIS in the trauma intensive care unit (ICU)
152	War injuries during the Gulf War: experience of a teaching hospital in Kuwait	A. Behbehani, F. Abu-Zidan, N. Hasaniya and J. Merei	1994	Kuwait	Military	16		14		2								16						Behbehani A, Abu-Zidan F, Hasaniya N, Merei J. War injuries during the Gulf War: experience of a teaching hospital in Kuwait. Annals of the Royal College of Surgeons of England. 1994 Nov;76(6):407.
40	Wilder Penfield Lecture: nature and management of penetrating head injuries during the Civil War in Lebanon	F. S. Haddad	1978	Lebanon	Military	219	Lebanon	179	82	40	18	82	33									Associate TBI with another variable
156	Percutaneous dilatational tracheostomies in a newly established trauma center: a report from Qatar	A. Parchani, R. Peralta, A. El-Menyar, M. Tuma, A. Zarour, S. Kumar, H. Abdulrahman, Y. AbdulRahman, H. Al-Thani and R. Latifi	2013	Qatar	Mulitple TBI Causes	807		761		46
150	Recreational-related head injuries in Qatar	Ashok Parchani, Ayman El-Menyar, Hassan Al-Thani, Mazin Tuma, Ahmad Zarour, Husham Abdulrahman, Ruben Peralta, Mohammad Asim Rifat Latifi"	2013	Qatar	Sports and Recreational	107	Qatar and Other	93	87	14	13	8	7					19	18	Surgical	Hematoma Hemorrhages Contusion	This study aimed to analyse frequency and characteristics of RRI in Qatar.	Yes, 21% (22 patients) Adults 79% (105 patients), None Caused by a war injury No No No No No All Were caused by sports injury (all 107 patients) No, in Qatar 11% are Arabs (Non Qataris, but are not specified whether any Lebanese patient exists) 89% are definetely NON Lebanese
